# Supplementary material for: Teaching Undergraduates to Communicate Science, Cultivate Mentoring Relationships, and Navigate Science Culture
Source: PubMed Central journal article supplement — CBE Life Sci Educ. 2021 Fall;20(3):ar31. doi: 10.1187/cbe.20-03-0052 (PMC8715813; doi:10.1187/cbe.20-03-0052), 2021
Supplement: cbe-20-ar31-s001.pdf [file cbe-20-ar31-s001.pdf]

# Supplemental Material

*CBE—Life Sciences Education*

Wrighting *et al.*

## 1 **Supplemental Material Legends**

2 Supplemental Figure 1. Course components and self-reported learning. The course  
3 featured three main areas of focus that were presented as pillars supporting advancement  
4 in STEM careers. A word cloud represents student-reported learning, with the size of the  
5 words corresponding to the frequency they were mentioned by students.

6 Supplemental Figure 2. Course Syllabus, Spring 2017. The course syllabus provides the  
7 logistical information and course objectives, expectations, content and schedule for the  
8 third semester we offered the course.

9 Supplemental Figure 3. Pre-course survey, Spring 2017. On the first day of the class,  
10 enrolled students completed this survey to provide demographic information, describe  
11 their level of comfort under a variety of circumstances engaging with their research  
12 mentors, and indicated their familiarity with concepts to be covered in the course.

13 Supplemental Figure 4. Post-course survey, Spring 2017. On the final day of class,  
14 students completed a survey to assess learning and collect student feedback.

15 Supplemental Table 1. Course activities. Under each of the three main areas of focus, the  
16 major activities of the class are described.

17 Supplemental Table 2. Rubric for scoring video recordings of students' introductions. Each  
18 component was assigned a value of one, two, three or four corresponding to the level of  
19 proficiency. Based on the emphasis given each component during the course, these were  
20 assigned the weights shown in the first column. The final score for the assignment was  
21 determined summing the product of the component scores and these weights.

22 Supplemental Table 3. Rubric for scoring students' written abstracts. Each component  
23 was assigned a value of one, two, three or four corresponding to the level of proficiency.  
24 Based on the emphasis given each component during the course, these were assigned  
25 the weights shown in the first column. The final score for the assignment was determined  
26 summing the product of the component scores and these weights.

27 Supplemental Table 4. Rubric for scoring the Content components of students' slides.  
28 Each component was assigned a value of one, two, three or four corresponding to the  
29 level of proficiency. Based on the emphasis given each component during the course,  
30 these were assigned the weights shown in the first column. The final score for the  
31 assignment was determined summing the product of the component scores and these  
32 weights.

33 Supplemental Table 5. Rubric for scoring the Style components of students' slides. Each  
34 component was assigned a value of one, two, three or four corresponding to the level of  
35 proficiency. Based on the emphasis given each component during the course, these were  
36 assigned the weights shown in the first column. The final score for the assignment was  
37 determined summing the product of the component scores and these weights.

38 Supplemental Table 6. Rubric for scoring video recordings of the Content components of  
39 student's oral presentations. Each component was assigned a value of one, two, three or  
40 four corresponding to the level of proficiency. Based on the emphasis given each  
41 component during the course, these were assigned the weights shown in the first column.  
42 The final score for the assignment was determined summing the product of the  
43 component scores and these weights.

44 Supplemental Table 7. Rubric for scoring video recordings of the Style components of  
45 student's oral presentations. Each component was assigned a value of one, two, three or  
46 four corresponding to the level of proficiency. Based on the emphasis given each  
47 component during the course, these were assigned the weights shown in the first column.  
48 The final score for the assignment was determined summing the product of the  
49 component scores and these weights.

50 Supplemental Table 8. Bivariate analysis of demographic factors influencing changes in  
51 comfort interacting with mentors. Subgroups of students are shown that demonstrate  
52 statistically significant improvements in their comfort level interacting with mentors.

Supplemental Figure 1: Course Components and Self-Reported Learning

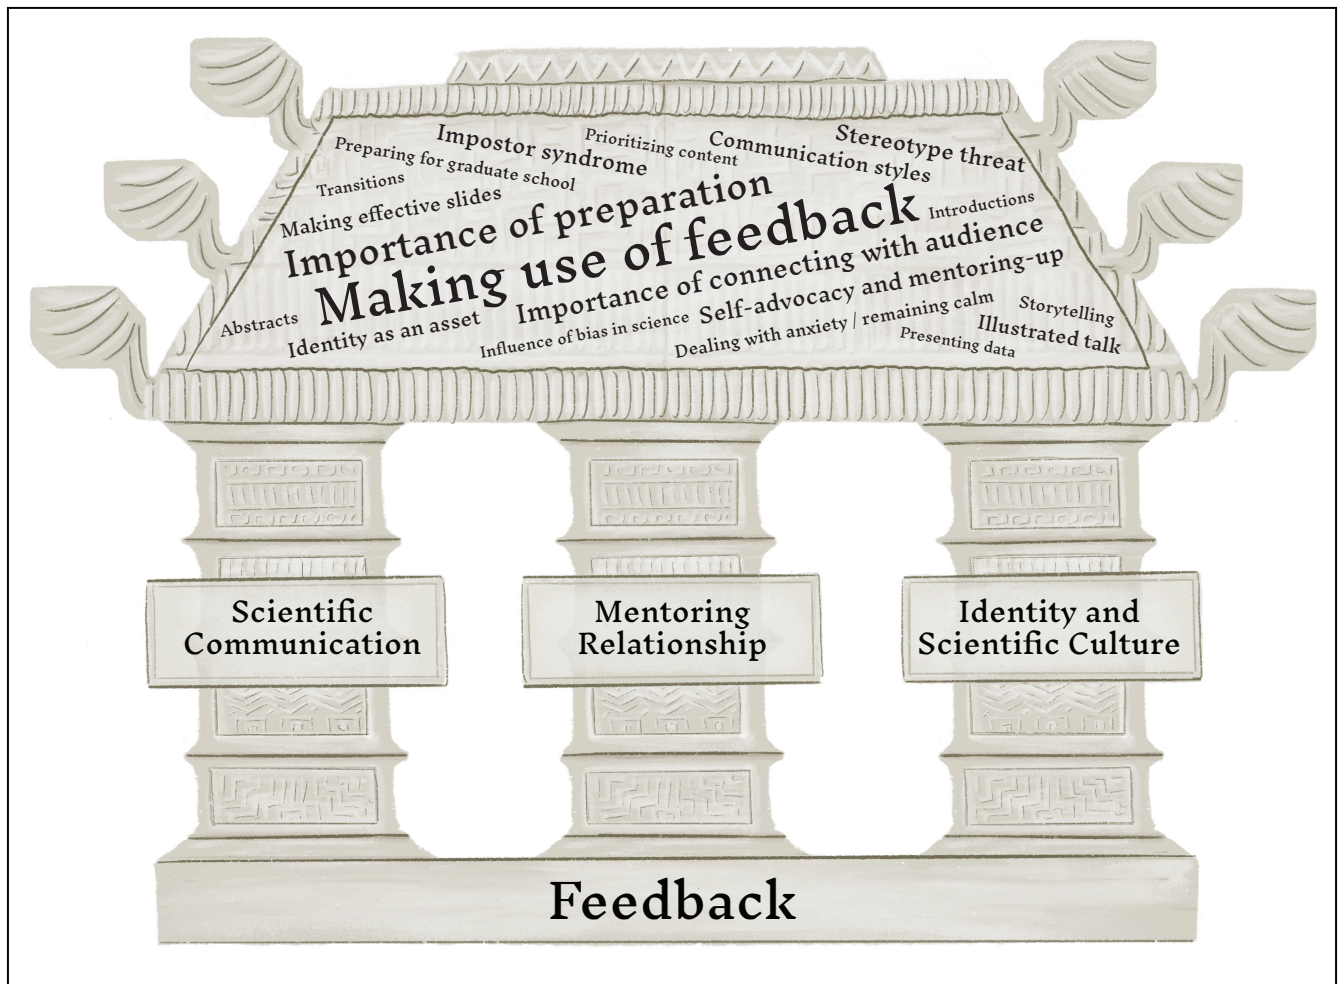

## Communicating in Science for Undergraduates

### Instructor Information

Adán Colón-Carmona, Ph.D., Associate Professor of Biology, University of Massachusetts, Boston  
([adan.colon-carmona@umb.edu](mailto:adan.colon-carmona@umb.edu); (617) 287-6680)

Bruce Birren, Ph.D., Co-Director, Genome Sequencing & Analysis Program, Director, Genomic Center for Infectious Diseases, Broad Institute of MIT and Harvard  
([bwb@broadinstitute.org](mailto:bwb@broadinstitute.org); (617) 714-7500)

Diedra M. Wrighting, Ph.D., Research Education Core Manager, University of Massachusetts, Boston  
([diedra.wrighting@umb.edu](mailto:diedra.wrighting@umb.edu); (617) 287-6082)

Gisselle Vélez-Ruiz, Ph.D., Program Director for Diversity, Education and Outreach, Broad Institute of MIT and Harvard  
([gvruiz@broadinstitute.org](mailto:gvruiz@broadinstitute.org); (617) 714-7500)

Jamie Dombach, Ph.D. Candidate, Department of Biology, University of Massachusetts, Boston  
([jdombach@hotmail.com](mailto:jdombach@hotmail.com))

#### Office Hours:

Professor Colón-Carmona: Mondays 12-1PM and Thursdays 11-12PM

- Integrated Sciences Complex 4410

Dr. Wrighting: Mondays 10-11AM and Tuesdays 11-12PM

- Campus Center 1-1109

### Course Information

**Course Title:** Communicating in Science for Undergraduates

**Location:** Integrated Sciences Complex, ISC 2003

**Time:** Monday/Wednesday 8:30-9:50AM

**Prerequisites:**

1. Current undergraduate researcher working on a research project
2. Completion of a pre-course questionnaire

#### Course

**Description:** This scientific communication course is an elective designed for undergraduates actively engaged in research. The course objectives are to improve students' ability to: 1) communicate scientific research and its purpose effectively, in oral and written forms, to a variety of audiences; 2) develop more engaging and effective relationships with research mentors; and 3) understand the cultural context of science, individual identities and the critical roles they play in science careers. Mastery of these skills is essential to success as scientists. Learning these skills early will allow a trainee to be better prepared for next steps, including graduate and professional school and first jobs.

**Communicating in Science for Undergraduates****Course**

**Objectives:** By fully participating in this course, one will be able to:

1. Communicate scientific research and its purpose effectively, in oral and written forms, to a variety of audiences
2. Develop more effective relationships with mentors and colleagues
3. Understand the cultural context of science, individual identities and the critical roles they play in scientific careers

**Blackboard:** All course information and assignments will be posted on Blackboard.

**Assignments:** Each class requires pre-work that must be done prior to class. Assignments are due by 11:59PM the Sunday before class unless otherwise specified.

**Course****Expectations:**

- ☞ Participation - Participation includes completing all required reading and writing assignments prior to class, attending class, thoughtfully participating in discussions, and taking responsibility for helping create a positive learning environment by arriving promptly, listening respectfully, and participating constructively.
- ☞ Absences - Attendance for each class session is essential. If you must miss class due to illness or other extenuating circumstances, please inform the professors as soon as possible with a written excuse. Pre-work assignments must still be submitted. Connect with your peers to discuss the material covered in class. Turn in a written summary of the topics missed to receive attendance credit for the day.
- ☞ Late Assignments – Late pre-work assignments will be accepted; however, full credit will not be given.

**Grading**

**Grading:** Students will receive a letter grade (A – 85-100%, B – 69-84%, C – 53-68%, D – 37-52%, F – 0-39%)

| Assignment/Deliverable                       | Relevant Course Objective | % of Grade |
|----------------------------------------------|---------------------------|------------|
| Homework Assignments                         | 1, 2 and 3                | 20         |
| Scientific Abstract Drafts                   | 1 and 3                   | 10         |
| Oral Presentation Preparation and Final Talk | 1 and 3                   | 40         |
| Attendance, Participation and 3-2-1 Surveys  | 1, 2 and 3                | 30         |

## Communicating in Science for Undergraduates

---

### Methods of Instruction

**Methods:** The course will be taught using the inverted classroom approach. Pre-work assignments will be given to introduce students to new material. These assignments are to be completed and submitted prior to class. Class will be used to discuss and foster a deeper understanding and practical use of each topic. Several pre-work assignments require collaboration with the mentor. Please do not wait until the last minute.

### Accommodations

Section 504 of the American with Disabilities Act of 1990 offer guidelines for curriculum modifications and adaptations for students with documented disabilities. If applicable, you may obtain adaptation recommendations from the UMass Boston Ross Center (617-287-7430). You need to present and discuss these recommendations with the instructor within a reasonable period, prior to the end of the Drop/Add period.

### Code of Student Conduct

Students are required to adhere to the Code of Student Conduct, including requirements for the **Academic Honesty Policy**, delineated in the University of Massachusetts Boston Undergraduate Program Catalog ([https://www.umb.edu/life\\_on\\_campus/policies/community/code](https://www.umb.edu/life_on_campus/policies/community/code)).

**Communicating in Science for Undergraduates****Course Schedule**

Breakfast will be provided.

**Highlighted = Mentors are always welcome, but we especially want them to attend highlighted**

| Session    | Date | Topic 1                                     | Topic 2                                          |
|------------|------|---------------------------------------------|--------------------------------------------------|
| 1<br>Wk1   | 1/23 | Pre-course evaluation                       | Course Roadmap and Information and Intro to NMRN |
| 2<br>Wk1   | 1/25 | Scientific Storytelling                     |                                                  |
| 3<br>Wk2   | 1/30 | Introducing Yourself I                      | Mentor Interview Discussion                      |
| 4<br>Wk2   | 2/1  | Mentoring Relationships                     | Understanding Communication Styles               |
| 5<br>Wk3   | 2/6  | Introducing Yourself II                     | Illustrated Talk Example                         |
| 6<br>Wk3   | 2/8  | Illustrated Talks I                         |                                                  |
| 7<br>Wk4   | 2/13 | <b>Abstract Exercise</b>                    |                                                  |
| 8<br>Wk4   | 2/15 | Introducing Yourself IV                     | Decision Making Bias                             |
| Wk5        | 2/20 | NO CLASS- PRESIDENT'S DAY                   |                                                  |
| 9<br>Wk5   | 2/22 | Receiving Feedback and Learning Orientation | Mentor Communication Styles Discussion           |
| 10<br>Wk6  | 2/27 | Illustrated Talks II                        | Layers of Identity                               |
| 11<br>Wk6  | 3/1  | Introduction to Interviews                  | Mock Interviews                                  |
| 12<br>Wk7  | 3/6  | Introducing Yourself V                      | Elements of a Great Talk                         |
| 13<br>Wk7  | 3/8  | Implicit Bias                               | Presentations: Take Home Messages                |
| Wk8        | 3/13 | NO CLASS- SPRNG BREAK                       |                                                  |
| Wk8        | 3/15 | NO CLASS- SPRNG BREAK                       |                                                  |
| 14<br>Wk9  | 3/20 | Imposter Syndrome                           | Review Abstracts                                 |
| 15<br>Wk9  | 3/22 | Mentor Identity Interviews Discussion       | Summarizing Research Papers                      |
| 16<br>Wk10 | 3/27 | Introducing Yourself VI                     | Graphic Displays of Data                         |



## Communicating in Science for Undergraduates | 2017

|            |      |                          |                       |
|------------|------|--------------------------|-----------------------|
| 17<br>Wk10 | 3/29 | Review Background Slide  | Stereotype Management |
| 18<br>Wk11 | 4/3  | Introducing Yourself VII | Review slides         |
| 19<br>Wk11 | 4/5  | Illustrated Talks II     |                       |
| 20<br>Wk12 | 4/10 | Public Speaking Anxiety  |                       |
| 21<br>Wk12 | 4/12 | Difficult Conversations  |                       |
| Wk13       | 4/17 | NO CLASS- PATRIOT'S DAY  |                       |
| 22<br>Wk13 | 4/19 | Practice Talks           |                       |
| 23<br>Wk14 | 4/24 | Practice Talks           |                       |
| 24<br>Wk14 | 4/26 | Practice Talks           |                       |
| 25<br>Wk15 | 5/1  | Practice Talks           |                       |
| 26<br>Wk15 | 5/3  | Practice Talks           |                       |
| 27<br>Wk16 | 5/8  | Final Talks              |                       |
| 28<br>Wk16 | 5/10 | Final Talks              |                       |

\* 1. On a scale of 1-10, how important is it for a scientist to have strong communication skills?

\* 2. Have you ever given an oral presentation using slides to an audience not including your research group meeting?

\* 3. Please rate your ability to do the following:

|                                                                             | Very Poor             | Poor                  | Average               | Good                  | Excellent             |
|-----------------------------------------------------------------------------|-----------------------|-----------------------|-----------------------|-----------------------|-----------------------|
| Introduce yourself and your research to a researcher outside your own group | <input type="radio"/> |
| Present your research project formally in front of an audience              | <input type="radio"/> |
| Create slides to accompany a formal presentation of your research project   | <input type="radio"/> |
| Write a scientific abstract that concisely describes your research project  | <input type="radio"/> |

\* 4. Name the sections of an effective scientific abstract.

\* 5. How long have you been working with your current mentors?

Faculty Mentor

Graduate student/Postdoctoral Mentor

Supplemental Figure 3: Pre-course Survey Spring 2017 (continued)

\* 6. How comfortable are you doing the following with your mentor:

|                                     | Very uncomfortable    | Mildly uncomfortable  | Neutral               | Comfortable           | Very comfortable      |
|-------------------------------------|-----------------------|-----------------------|-----------------------|-----------------------|-----------------------|
| Discussing goals                    | <input type="radio"/> |
| Seeking feedback                    | <input type="radio"/> |
| Receiving feedback                  | <input type="radio"/> |
| Initiating a difficult conversation | <input type="radio"/> |
| Managing a difficult conversation   | <input type="radio"/> |

\* 7. To what extent do you agree with the following statement: "The primary role of my mentor is to tell me what to do."

Strongly disagree

Disagree

Agree

Strongly Agree

\* 8. Name things a mentee can do to have a successful relationship with their mentor

\* 9. How familiar are you with the following concepts?

|                                 | Unfamiliar            | A little familiar     | Moderately familiar   | Familiar              | Very familiar         |
|---------------------------------|-----------------------|-----------------------|-----------------------|-----------------------|-----------------------|
| Stereotype management           | <input type="radio"/> |
| Solo status                     | <input type="radio"/> |
| Imposter syndrome               | <input type="radio"/> |
| Implicit bias                   | <input type="radio"/> |
| Multiple components of identity | <input type="radio"/> |

Supplemental Figure 3: Pre-course Survey Spring 2017 (continued)

\* 10. Please define the concepts you are moderately to very familiar with. Include where you learned about each concept.

Stereotype threat

Solo status

Imposter syndrome

Implicit bias

Multiple components of identity

\* 11. I am

- male
- female
- gender non-binary
- gender non-conforming

\* 12. What is your ethnicity?

- Hispanic or Latino
- Non-Hispanic or Latino

\* 13. Which race best describes you? (You may choose more than one.)

- American Indian or Alaskan Native
- Asian / Pacific Islander
- Black or African American
- White / Caucasian
- Other (please specify)

\* 14. Did one or both of your parents/guardians graduate from college?

- yes
- no

1. On a scale of 1-10 (where 1 is not and 10 is very important), how important is it for a scientist to have strong communication skills?

2. Please rate the following:

|                                                                                                                            | Very Poor             | Poor                  | Average               | Good                  | Excellent             |
|----------------------------------------------------------------------------------------------------------------------------|-----------------------|-----------------------|-----------------------|-----------------------|-----------------------|
| BEFORE taking this course, how were you at discussing your research project informally?                                    | <input type="radio"/> |
| AFTER taking this course, how are you at discussing your research project informally?                                      | <input type="radio"/> |
| BEFORE taking this course, how were you at discussing your research project formally in front of an audience?              | <input type="radio"/> |
| AFTER taking this course, how are you at discussing your research project formally in front of an audience?                | <input type="radio"/> |
| BEFORE taking this course, how were you at creating slides to accompany a formal presentation of your research project?    | <input type="radio"/> |
| AFTER taking this course, how are you at creating slides to accompany a formal presentation of your research project?      | <input type="radio"/> |
| BEFORE taking this course, how were you at writing a scientific abstract that effectively describes your research project? | <input type="radio"/> |

Supplemental Figure 4: Post-course Survey Spring 2017 (continued)

|                                                                                                                          | Very Poor             | Poor                  | Average               | Good                  | Excellent             |
|--------------------------------------------------------------------------------------------------------------------------|-----------------------|-----------------------|-----------------------|-----------------------|-----------------------|
| AFTER taking this course, how are you at writing a scientific abstract that effectively describes your research project? | <input type="radio"/> |

(BEFORE taking this course, how were you at creating a poster that effectively describes your research project?)

|                       |                       |                       |                       |                       |                       |
|-----------------------|-----------------------|-----------------------|-----------------------|-----------------------|-----------------------|
| <input type="radio"/> |
|-----------------------|-----------------------|-----------------------|-----------------------|-----------------------|-----------------------|

(AFTER taking this course, how are you at creating a poster that effectively describes your research project?)

|                       |                       |                       |                       |                       |                       |
|-----------------------|-----------------------|-----------------------|-----------------------|-----------------------|-----------------------|
| <input type="radio"/> |
|-----------------------|-----------------------|-----------------------|-----------------------|-----------------------|-----------------------|

3. How comfortable are you doing the following with your mentor:

|                                     | Very uncomfortable    | Mildly uncomfortable  | Neutral               | Comfortable           | Very comfortable      |
|-------------------------------------|-----------------------|-----------------------|-----------------------|-----------------------|-----------------------|
| Communicating goals                 | <input type="radio"/> |
| Navigating a difficult conversation | <input type="radio"/> |
| Expressing your opinion             | <input type="radio"/> |
| Receiving feedback                  | <input type="radio"/> |

4. The primary role of my mentor is to tell me what to do.

| True                  | False                 |
|-----------------------|-----------------------|
| <input type="radio"/> | <input type="radio"/> |

5. What are the most valuable things you learned in this course?

6. An abstract is a short summary of your research, typically one paragraph long. Write the first two sentences of an abstract that describes your research.

Supplemental Figure 4: Post-course Survey Spring 2017 (continued)

7. How familiar are you with the following concepts?

|                      | Unfamiliar            | A little familiar     | Moderately familiar   | Familiar              | Very familiar         |
|----------------------|-----------------------|-----------------------|-----------------------|-----------------------|-----------------------|
| Stereotype threat    | <input type="radio"/> |
| Solo status          | <input type="radio"/> |
| Imposter syndrome    | <input type="radio"/> |
| Communication styles | <input type="radio"/> |
| Implicit bias        | <input type="radio"/> |

8. Please define the concepts you are moderately to very familiar with.

Stereotype threat

Solo status

Imposter syndrome

Communication styles

9. How have the concepts you have defined above impacted your career as a scientist?

10. Please write a few thoughts you want the next class to know about the social factors we discussed in class and how they are relevant to carrying out scientific research. Your feedback will be kept anonymous.

11. How do feel about your final talk?

- Very unhappy
- Unhappy
- Mixed
- Pleased
- Very pleased

What is your reaction to the amount of work it took to create your final talk?

Supplemental Figure 4: Post-course Survey Spring 2017 (continued)

12. Which of the following techniques did you use to combat anxiety for your final presentation? (Check all that apply.)

- practicing
- breathing deeply
- touching a stone
- finding friendly faces in the audience
- pausing to take a drink of water
- doing the power pose
- familiarizing yourself with the space/environment beforehand
- focusing away from anxiety causing thoughts
- none. I did not use techniques to combat anxiety.

other, please specify.

13. What communication skills do you still need to improve?

14. What components of the course did you want to know more about?

15. Please share your ideas about the most valuable change or addition that could be made to improve this course in general.

16. Which components of the course were least useful? Why?



Supplemental Table 1: Course Activities

| Topic Area                      | Activity                          | Details                                                                                                                                                                                                                                                 | Notes                                                                                                                                                                                                                                                          |
|---------------------------------|-----------------------------------|---------------------------------------------------------------------------------------------------------------------------------------------------------------------------------------------------------------------------------------------------------|----------------------------------------------------------------------------------------------------------------------------------------------------------------------------------------------------------------------------------------------------------------|
| <b>Scientific Communication</b> | Giving/receiving feedback         | Students received instruction on how to give and receive feedback (growth mindset, Dweck, 2017). Students applied these principles through many iterative rounds of providing and receiving presentation feedback from peers.                           | The ongoing emphasis on feedback and the progressive escalation of activities involving feedback shifted student's initial reluctance to provide or receive feedback to embracing it, such that by the end of the course feedback was, primarily, student-led. |
|                                 | Giving Constructive Feedback      | Students worked in trios, each reading a different scientific abstract containing several flaws. Students prioritized and delivered constructive feedback. The receiver took notes and delivered their own "feedback about the feedback" <sup>1</sup> . |                                                                                                                                                                                                                                                                |
|                                 | Drafting a scientific abstract I  | Students wrote an abstract about their research. After receiving feedback from their research mentor, a course instructor, and student peers, students submitted revised abstracts.                                                                     |                                                                                                                                                                                                                                                                |
|                                 | Drafting a scientific abstract II | Students were given an as-yet-unpublished manuscript and asked to write a specific element of an abstract for it. In class students reviewed, combined, and edited all contributions to create a complete abstract for the manuscript.                  | Using an unpublished manuscript eliminates any temptation to search for the actual abstract.                                                                                                                                                                   |
|                                 | Recorded introductions            | In most class sessions, students brief oral introductions (elevator pitches) were recorded.                                                                                                                                                             |                                                                                                                                                                                                                                                                |

Supplemental Table 1: Course Activities (continued)

|                                |                                         |                                                                                                                                                                                                                                                                                                                                                                                                                                                                                                                                                                                                                  |                                                                                                                                                                                                                                                                                          |
|--------------------------------|-----------------------------------------|------------------------------------------------------------------------------------------------------------------------------------------------------------------------------------------------------------------------------------------------------------------------------------------------------------------------------------------------------------------------------------------------------------------------------------------------------------------------------------------------------------------------------------------------------------------------------------------------------------------|------------------------------------------------------------------------------------------------------------------------------------------------------------------------------------------------------------------------------------------------------------------------------------------|
|                                |                                         | Students reviewed recordings and instructor/peer feedback to foster improvement.                                                                                                                                                                                                                                                                                                                                                                                                                                                                                                                                 |                                                                                                                                                                                                                                                                                          |
|                                | Illustrated talks                       | Students gave “illustrated talks”, in which they explained their research projects using simple sketches drawn in real-time. Students who were listening were encouraged to interrupt whenever points were not clear and provided feedback afterward.                                                                                                                                                                                                                                                                                                                                                            | The interruptions were valuable both to emphasize the desired conversational tone of the talk and to provide the speaker with immediate feedback about what was not clear.                                                                                                               |
|                                | Oral Presentations                      | All students gave formal, “final oral presentations” about their research projects. Students began early in the semester by making a rough outline of their talk, and writing down the key messages they hoped the audience would take away. Over time, students made slides for specific portions of their talk (e.g., starting with background and significance) and revised until a final slide deck was prepared. Students received feedback from other students, course instructors, and visiting mentors, on the organization and delivery of the presentation as well as on the slides, images, and data. | The final presentation represented the culmination of the work of the entire semester. Having students deliver these in a formal setting, with their mentors, faculty, and friends attending, was intended to contribute to students' self-efficacy concerning scientific communication. |
| <b>Mentoring Relationships</b> | Mentor Interview 1: Career Path/Journey | Students asked their mentors: Why did they want to be a scientist? What do they think are the keys to their                                                                                                                                                                                                                                                                                                                                                                                                                                                                                                      | In addition to building connection, discussing these questions enabled mentors and mentees to align their expectations                                                                                                                                                                   |

Supplemental Table 1: Course Activities (continued)

|  |                                           |                                                                                                                                                                                                                                                                                                                                                                                                                             |                                                                                                                                                                   |
|--|-------------------------------------------|-----------------------------------------------------------------------------------------------------------------------------------------------------------------------------------------------------------------------------------------------------------------------------------------------------------------------------------------------------------------------------------------------------------------------------|-------------------------------------------------------------------------------------------------------------------------------------------------------------------|
|  |                                           | <p>success? Who has had the greatest influence on them? How would they like the student to bring questions to them? What expectations do they have for the student this semester?</p>                                                                                                                                                                                                                                       | <p>(Balster et. al., 2010 and Pfund et. al., 2014).</p>                                                                                                           |
|  | Mentor Interview 2: Communication Style   | <p>After completing their communication style inventory, students were asked to draw on their own observations to predict their mentors' communication styles. Students' mentors were asked to complete a communication style inventory. Class discussions focused on how to use this information to communicate better with their mentor.</p>                                                                              | <p>Asking the mentors to complete the inventory as part of the class reduced the barriers to talking about communication within the mentoring dyad.</p>           |
|  | Mentor Interview 3: Identity <sup>2</sup> | <p>Students were asked to ask their mentors the same questions they themselves answered previously about the dominant aspects of their identities at work versus at home, and how and why they might differ. The in-class discussion focused on obvious and less obvious similarities and differences between students' and mentors' identities and the possible impact these differences may have on the relationship.</p> | <p>Engaging mentors in conversations about the salience of their identities in research was both surprising and rewarding to both students and their mentors.</p> |
|  | Mentoring Up                              | <p>An interactive workshop (based on Lee, Pfund and Branchaw, 2015) about the importance of</p>                                                                                                                                                                                                                                                                                                                             |                                                                                                                                                                   |

Supplemental Table 1: Course Activities (continued)

|                                      |                                                          |                                                                                                                                                                                                                                                                  |                                                                                                                                                                                            |
|--------------------------------------|----------------------------------------------------------|------------------------------------------------------------------------------------------------------------------------------------------------------------------------------------------------------------------------------------------------------------------|--------------------------------------------------------------------------------------------------------------------------------------------------------------------------------------------|
|                                      |                                                          | mentorship and the students' opportunities and responsibilities to optimize these relationships.                                                                                                                                                                 |                                                                                                                                                                                            |
|                                      | Difficult conversations                                  | An interactive workshop about how to prepare for and engage in difficult conversations, and how to learn and grow from these conversations.                                                                                                                      | Difficult conversations of many kinds were discussed, including personal ones as well as those with their research mentors, faculty advisors, and other members of the research community. |
|                                      | Strategies to overcome fears and anxiety around speaking | Instructors and mentors shared their experiences and strategies to reduce anxiety before giving a presentation. <sup>2</sup>                                                                                                                                     | This engagement both provided tips and normalized nervousness about talking in front of groups.                                                                                            |
| <b>Social Identities and Science</b> | Implicit Bias/Decision Making                            | Outside of class, students read articles on the origins and impact of implicit bias (Kahneman, 2012 and Moss-Racusin et. al., 2012) and answered discussion questions about the impact of the findings and principles in their lives; answers discussed in class |                                                                                                                                                                                            |
|                                      | Imposter Syndrome                                        | Outside of class, students read Roché, 2014 and answer questions about recognizing and combating the impostor phenomenon; follow up discussion in class.                                                                                                         |                                                                                                                                                                                            |
|                                      | Stereotype threat                                        | Outside of class students read McGee and Martin, 2011 and answered questions about recognizing and combating stereotype threat; discussed in class.                                                                                                              |                                                                                                                                                                                            |

<sup>1</sup>Could also go under mentoring relationships

## Supplemental Table 1: Course Activities (continued)

<sup>2</sup> Could also go under social identities and science

### References

- Balster, N., Pfund, C., Rediske, R., & Branchaw, J. (2010). Entering research: a course that creates community and structure for beginning undergraduate researchers in the STEM disciplines. *CBE—Life Sciences Education*, 9(2), 108-118.
- Dweck, C. S. (2017). *Mindset: Changing the way you think to fulfil your potential*. New York: Robinson.
- Kahneman, D. (2012). Of 2 Minds: How Fast and Slow Thinking Shape Perception and Choice. *Scientific American*, Reprinted from *Thinking, Fast and Slow*.
- Lee S., McGee R., Pfund C., & Branchaw J.. (2015). Mentoring Up”: Learning to Manage Your Mentoring Relationships. In G. Wright (Ed.), *The mentoring continuum : from graduate school through tenure*. Syracuse, New York: Graduate School Press of Syracuse University.
- McGee, E. O., & Martin, D. B. (2011). “You would not believe what I have to go through to prove my intellectual value!” Stereotype management among academically successful Black mathematics and engineering students. *American Educational Research Journal*, 48(6), 1347-1389.
- Moss-Racusin, C. A., Dovidio, J. F., Brescoll, V. L., Graham, M. J., & Handelsman, J. (2012). Science faculty’s subtle gender biases favor male students. *Proceedings of the national academy of sciences*, 109(41), 16474-16479.
- Pfund, C., Handelsman, J., & Branchaw, J. (2014). *Entering mentoring*. WH Freeman.
- Roché, J. (2014). Conquering impostor syndrome: Lessons from female and minority business leaders. *Leader to Leader*, 2014(74), 13-18.

Supplemental Table 2: Rubric for Scoring Video Recordings of Students' Introductions

| <b>Weight</b> | <b>Non-verbal</b>           | <b>Beginning (1)</b>                                                                                                                                                         | <b>Developing (2)</b>                                                                                                                                | <b>Proficient (3)</b>                                                                                                     | <b>Mastery (4)</b>                                                                                                           |
|---------------|-----------------------------|------------------------------------------------------------------------------------------------------------------------------------------------------------------------------|------------------------------------------------------------------------------------------------------------------------------------------------------|---------------------------------------------------------------------------------------------------------------------------|------------------------------------------------------------------------------------------------------------------------------|
| 1             | Eye contact                 | No eye contact with audience, stares only at the camera or notes.                                                                                                            | Displayed minimal eye contact with audience. Spends most of the time staring at camera or notes.                                                     | Consistent use of direct eye contact with audience. Minimal time staring at camera or notes.                              | Holds attention of entire audience with the use of direct eye contact.                                                       |
| 1             | Poise                       | Tension and nervousness is obvious and constant; easily flustered by mistakes. Unable to recover.                                                                            | Displays mild anxiety; has trouble recovering from mistakes.                                                                                         | Makes minor mistakes, but quickly recovers from them; displays little or no anxiety.                                      | Student displays relaxed, self-confident nature about self, recovers quickly from mistakes.                                  |
| 1             | Body Language               | Body position indicates withdrawal. Rigid, no movement or descriptive gestures. Student is hugging her/his self.                                                             | Very little movement or descriptive gestures, hand and arm movement distracting. Student's posture fluctuates.                                       | Made movements or gestures that enhances articulation.                                                                    | Upright posture, shoulders are straight, body relaxed. Movements are fluid and helpful to audience.                          |
| <b>Weight</b> | <b>Verbal</b>               | <b>Beginning (1)</b>                                                                                                                                                         | <b>Developing (2)</b>                                                                                                                                | <b>Proficient (3)</b>                                                                                                     | <b>Mastery (4)</b>                                                                                                           |
| 1             | Enthusiasm                  | Doesn't seem interested in topic presented.                                                                                                                                  | Seems relatively uninterested toward topic presented.                                                                                                | Occasionally shows positive feelings about topic.                                                                         | Conveys strong enthusiasm for the work.                                                                                      |
| 1             | Elocution (Volume and tone) | Student speaks too quietly to be heard, mumbles, and incorrectly pronounces terms. Student consistently presents information in a robotic manner going down on a check list. | Student is often hard to hear or understand. Student often sounds like they are robotically going down a list. Student incorrectly pronounces terms. | Student is largely clear and audible, mostly with a natural conversational tone. Student pronounces most words correctly. | Student consistently uses a clearly audible voice and a natural, conversational tone. Student correctly pronounces of terms. |
| 2             | Language (Jargon)           | Language choices are limited, peppered with jargon, inaccessible for the audience.                                                                                           | Language used is often jargon that makes it hard to understand the content.                                                                          | Language used is mostly familiar, some jargon is mentioned but defined, so that the audience can understand the content.  | Language is familiar and appropriate for the audience.                                                                       |
| <b>Weight</b> | <b>Content</b>              | <b>Beginning (1)</b>                                                                                                                                                         | <b>Developing (2)</b>                                                                                                                                | <b>Proficient (3)</b>                                                                                                     | <b>Mastery (4)</b>                                                                                                           |
| 1             | Organization                | There is no logical sequence of information.                                                                                                                                 | Student jumps around in a confusing way.                                                                                                             | Student presents most of the information in a logical sequence.                                                           | Student presents information in logical sequence.                                                                            |
| 0.5           | Length and balance          | Student omits more than one section.                                                                                                                                         | Student omits a key section, provides too much or too little information for the different sections.                                                 | Student covers all the sections but, in an obviously unbalanced way.                                                      | Student covers all the critical information** in a concise manner with appropriate balance between the sections.             |

**Sections required: full name, academic year, research group, general area of work, what specifically they are working on, and why it matters**

Supplemental Table 3: Rubric for Scoring Students' Written Abstracts

| Weight | Criteria                                               | Beginning (1)                                                                                                                                                             | Developing (2)                                                                                                                                                                                                                      | Proficient (3)                                                                                                                                                                | Mastery (4)                                                                                                                                                    |
|--------|--------------------------------------------------------|---------------------------------------------------------------------------------------------------------------------------------------------------------------------------|-------------------------------------------------------------------------------------------------------------------------------------------------------------------------------------------------------------------------------------|-------------------------------------------------------------------------------------------------------------------------------------------------------------------------------|----------------------------------------------------------------------------------------------------------------------------------------------------------------|
| 1      | Title                                                  | Too long or too short, does not capture the interest of the audience nor provides information about what will be presented, is stated as a question                       | Not too long or too short, but could be shortened, attempts to capture interest, but does not provide information about what will be presented, not a question                                                                      | Appropriate length, however, does not capture the interest of the audience and provides information about what will be presented, not a question                              | Appropriate length, captures the interest of the audience and provides information about what will be presented, not a question                                |
| 1      | Background/Significance                                | Abstract does not provide an overview the main story and scope of work. It also does not foster an understanding of the relevance and importance of the research.         | Background could be clearer but provides an overview the main story and scope of work. It provides a statement of the relevance and importance of the research but needs improvement.                                               | Background could be clearer but provides an overview the main story and scope of work. Fosters an understanding of the relevance and importance of the research.              | Background contains a clear overview of the topic and scope of work and fosters an understanding of the relevance and importance of the research.              |
| 1      | Statement of Problem with relevant Question/Hypothesis | Problem is not stated. Research question and or hypothesis is not stated in the abstract.                                                                                 | Research question and or hypothesis is stated but needs some improvement to be readily apparent to the reader. No rationale given.                                                                                                  | Research question and or hypothesis is stated and apparent to the reader but could be tightened. Logic could be clearer.                                                      | Research question and or hypothesis is clearly stated and readily apparent to the reader. Rationale is stated and is logical.                                  |
| 2      | The "So What"                                          | A description of why the research is being conducted is not present                                                                                                       | A description of why the research is being conducted is present but is not clearly stated.                                                                                                                                          | A description of why the research is being conducted is clearly stated but does not connect to the broader background.                                                        | A description of why the research is being conducted is clearly stated and connects the research to the broader background.                                    |
| 1      | Experimental Design/Methods/Approach                   | No mention of methods, methods not at all clear, too many different methods shown, or described in too much or too little detail                                          | Methods somewhat confusing because either too many different methods shown, or described in too much or too little detail                                                                                                           | Methods are described but not clearly, lacks logical connection between steps of methods or between methods and aims or results                                               | Key methods are described clearly, in logical order, with only those details needed to understand results                                                      |
| 1      | Results/Findings                                       | Abstract does not provide an explanation of what was discovered, accomplished, collected or produced                                                                      | Results section provides an explanation of what was discovered, accomplished, collected or produced but needs some improvement to be readily apparent to the reader.                                                                | Results section provides an explanation of what was discovered, accomplished, collected or produced.                                                                          | Results section provides a succinct and specific explanation of what was discovered, accomplished, collected or produced.                                      |
| 1      | Summary/Conclusions                                    | No clear summary or conclusion provided, or conclusions simply restatement of previous statement                                                                          | Summary or conclusion present, with insufficient reflection                                                                                                                                                                         | Clear summary or conclusion given but without implications                                                                                                                    | Clear summary of what was learned and implications                                                                                                             |
| 1      | Implications/Speculation/Recommendation                | Abstract does not evaluate what the results mean to the investigation or describe how the investigation fits into the larger field of science with possible implications. | This section evaluates what the results mean to the investigation, describes how the investigation fits into the larger field of science and possible implications but needs some improvement to be readily apparent to the reader. | Evaluates what the results mean to the investigation, describes how the investigation fits into the larger field of science and possible implications but could be tightened. | Clearly evaluates what the results mean to the investigation, describes how the investigation fits into the larger field of science and possible implications. |
| 0.5    | Length                                                 | Abstract is less than 150 words or greater than 300. Inappropriate length of one or more sections.                                                                        | Abstract is within appropriate word limit but one or more sections are inappropriate lengths.                                                                                                                                       | Abstract is within recommended length, but is wordy and repetitive. Could be more succinct.                                                                                   | Abstract is short and clear, with each section no longer than 2-3 sentences. It meets the recommended length between 200-300 words.                            |

Supplemental Table 3: Rubric for Scoring Students' Written Abstracts (continued)

| <b>Weight</b> | <b>Criteria</b>     | <b>Beginning (1)</b>                                                                                                                                     | <b>Developing (2)</b>                                                                          | <b>Proficient (3)</b>                                                                                                                | <b>Mastery (4)</b>                                                                                                                                          |
|---------------|---------------------|----------------------------------------------------------------------------------------------------------------------------------------------------------|------------------------------------------------------------------------------------------------|--------------------------------------------------------------------------------------------------------------------------------------|-------------------------------------------------------------------------------------------------------------------------------------------------------------|
| 2             | Audience & Language | Abstract is not framed or targeted for the appropriate audience. It uses passive voice, some questionable word choices, and or many instances of jargon. | Abstract is mostly written in active voice, has a few instances of poor word choice or jargon. | Abstract is targeted for the appropriate audience; written in active voice, uses appropriate word choices, however, has some jargon. | Abstract is clearly framed and targeted for the appropriate audience. It is written in active voice, uses appropriate word choices and excludes all jargon. |
| 1             | Grammar             | Abstract has four or more grammatical errors.                                                                                                            | Abstract has no more than three grammatical errors.                                            | Abstract has no more than two grammatical errors.                                                                                    | Abstract has consistent verb tense and correct spelling, capitalization, punctuation, and defines all acronyms.                                             |



Supplemental Table 4: Rubric for Scoring the Content Components of Students' Slides

| <b>Weight</b> | <b>Criteria</b>                                                        | <b>Beginning (1)</b>                                                                                                                                                                     | <b>Developing (2)</b>                                                                                                     | <b>Proficient (3)</b>                                                                                                           | <b>Mastery (4)</b>                                                                                        |
|---------------|------------------------------------------------------------------------|------------------------------------------------------------------------------------------------------------------------------------------------------------------------------------------|---------------------------------------------------------------------------------------------------------------------------|---------------------------------------------------------------------------------------------------------------------------------|-----------------------------------------------------------------------------------------------------------|
| 1             | Slide Headings                                                         | Headings are vague, simply descriptive (e.g. "Background", "Methods" hypothesis) and do not convey slide content or takeaway message. Note: "Conclusions" is acceptable as a slide title | Some headings are declarative statements, effectively summarize facts or findings, introduce slide content                | Most, but not all, headings are declarative statements, summarize facts or findings, introduce slide content                    | Headings are declarative statements, effectively summarize facts or findings, introduce slide content     |
| 1             | Introduction/Background<br>General Background<br>Science               | General background not covered                                                                                                                                                           | General background science is scant or does not relate to the present study                                               | General background provided is relevant but too little or too much is provided                                                  | Appropriate general background, clearly is explained and connected to aims (see below)                    |
| 1             | Introduction/Background<br>Motivation                                  | Motivations for current work neither clear nor logical                                                                                                                                   | Insufficient coverage of motivation, leaves audience unsure why studies are being done                                    | Motivations are relevant, but too little or too much detail is provided                                                         | Motivations are clear and logical                                                                         |
| 2             | Statement of Problem<br>with relevant Questions,<br>Hypotheses or Aims | No statement of main problem and research questions, hypotheses or aims                                                                                                                  | Either main problem or research question, hypothesis or aims, but not both, are stated                                    | Main problem and research aims are covered but are unclear                                                                      | Clear statement of problem and research aims                                                              |
| 1             | Methodology/<br>Experimental Design<br>or Approach                     | No mention of methods, methods not at all clear, too many different methods shown, or described in too much or too little detail                                                         | Methods somewhat confusing because either too many different methods shown, or described in too much or too little detail | Methods are described but not clearly, lacks logical connection between steps of methods or between methods and aims or results | Key methods are described clearly, in logical order, with only those details needed to understand results |
| 2             | Significance                                                           | Significance of findings are not covered                                                                                                                                                 | Significance of findings described but unclear                                                                            | Significance of most findings described                                                                                         | Significance of each major finding described clearly                                                      |
| 1             | Summary/Conclusions                                                    | No clear summary or conclusion provided, or conclusions simply restatement of previous statement                                                                                         | Summary or conclusion present, with insufficient reflection                                                               | Clear summary or conclusion given but without implications                                                                      | Clear summary of what was learned and implications                                                        |
| 1             | Future Directions                                                      | No future directions described                                                                                                                                                           | Very brief description of future work                                                                                     | Some description of future work but significance not obvious, or future work not connected to findings                          | Future directions are outlined, and are logical extensions of the findings                                |
| 0.5           | Acknowledgements                                                       | Lack of acknowledgements slide                                                                                                                                                           | Acknowledgement slide included, but seems incomplete or role of people being acknowledged not clear                       | Acknowledgements are present, but not organized in a logical manner                                                             | Clear, well-organized acknowledgement slide indicating names and roles of people                          |

Supplemental Table 5: Rubric for Scoring the Style Components of Students' Slides

| Weight | Criteria                | Beginning (1)                                                                                                                                                                                                                                                                         | Developing (2)                                                                                                                                                                                                                       | Proficient (3)                                                                                                                                                                                                                                               | Mastery (4)                                                                                                                                                                                                                                             |
|--------|-------------------------|---------------------------------------------------------------------------------------------------------------------------------------------------------------------------------------------------------------------------------------------------------------------------------------|--------------------------------------------------------------------------------------------------------------------------------------------------------------------------------------------------------------------------------------|--------------------------------------------------------------------------------------------------------------------------------------------------------------------------------------------------------------------------------------------------------------|---------------------------------------------------------------------------------------------------------------------------------------------------------------------------------------------------------------------------------------------------------|
| 1      | Slide Background        | Slide background visually distracting or interferes with readability of title or other slide elements                                                                                                                                                                                 | Slide background visually distracting or sometimes interferes with readability of title or other slide elements                                                                                                                      | Slide background modestly visually distracting or occasionally interferes with readability of title or other slide elements                                                                                                                                  | Slide background gives unified look to presentation without compromising readability                                                                                                                                                                    |
| 1      | Color                   | Colors used for text make all slides difficult to read, too bright or lack the contrast needed to be viewed easily by the audience<br><br>Multiple text colors, apparently used at random, not used consistently                                                                      | Colors used for text on some slides are too bright or lack the contrast necessary to be viewed easily by the audience<br><br>Colors used for a specific purpose but inconsistently some of the time, thus could confuse the audience | Background and text colors have appropriate brightness and contrast necessary for an audience to view easily on most slides<br><br>When color is used for a specific purpose, it is used consistently, most of the time, to aid the audience's understanding | All slides have text in appropriate brightness and contrast necessary for an audience to view easily.<br><br>If additional text colors are used it is for specific purpose. Additional text color used consistently to aid the audience's understanding |
| 1      | Animation               | Animation effects are distracting, many different styles of animation used, excessive use of animation, OR animation is not used when it would be most effective                                                                                                                      | Animation used ineffectively or frequently distracting to audience. Animation is sloppy, animated not elements are not grouped appropriately                                                                                         | Animation occasionally distracting, two or fewer types of animation are used sparingly OR animation occasionally not used when it would simplify presentation                                                                                                | If used, animation is simple and used sparingly to simplify presentation aid audience's understanding. Animation is not used, but is not necessary.                                                                                                     |
| 1      | Consistency of Format   | Slides do not have consistent layout/formatting throughout the deck                                                                                                                                                                                                                   | Some slides have consistent layout/formatting throughout the deck                                                                                                                                                                    | Most, but not all slides have consistent layout/formatting throughout the deck                                                                                                                                                                               | Slides have consistent layout/formatting throughout the deck                                                                                                                                                                                            |
| 2      | Figures Graphs and data | Includes too many figures, rather than just the key ones. Figures are confusing, unlabeled and/or the information they contain seemingly irrelevant                                                                                                                                   | Contains redundant or unnecessary figures, components of figures are unclear, unlabeled                                                                                                                                              | Most figures are clear, labeled and important to the presentation                                                                                                                                                                                            | Includes just figures needed to support main findings. All figures clear and labeled, allow audience to quickly understand results                                                                                                                      |
| 2      | Figures Readability     | Cluttered, minimal open space, hard to read                                                                                                                                                                                                                                           | Many cluttered, lack open space, many hard to read                                                                                                                                                                                   | Few cluttered, most have open space, most easy to read                                                                                                                                                                                                       | Uncluttered, lots of open space, all elements easy to read                                                                                                                                                                                              |
| 1      | Space                   | Slides overcrowded, visually cluttered making it hard to quickly comprehend. Too many elements per slide or elements are arranged strangely on the slide without much empty space on all slides. Or, too much empty space, slides lack simple, relevant, interesting visual elements. | Most slides are overcrowded, with elements arranged strangely on the slide without much empty space, or most slides lack simple, relevant, interesting visual elements                                                               | Most slides are not overcrowded, they have elements arranged in a logical, aesthetically pleasing way that provides ample empty space resulting in slides that are quickly understood                                                                        | All slides have elements laid out on the slide in a logical, aesthetically pleasing way that provides ample empty space, resulting in slides that are quickly understood                                                                                |
| 2      | Text Amount             | All slides contain too much text and require a long time to read. Text written in complete sentences, rather than phrases, taking audience's attention from the presenter.                                                                                                            | Some slides contain too much text and require a long time to read. Text written in complete sentences, rather than phrases, taking audience's attention from the presenter.                                                          | Most slides contain an appropriate amount of text written in phrases that are easily digested by an audience                                                                                                                                                 | All slides contain an appropriate amount of text, written in phrases that are easily digested by an audience                                                                                                                                            |

Supplemental Table 5: Rubric for Scoring the Style Components of Students' Slides (continued)

|   |           |                                                                                                                                  |                                                               |                                                                |                                                                                                          |
|---|-----------|----------------------------------------------------------------------------------------------------------------------------------|---------------------------------------------------------------|----------------------------------------------------------------|----------------------------------------------------------------------------------------------------------|
| 2 | Text Size | Font sizes on all slides are hard to read, font size inconsistent. Most text less than 24pt, inconsistent use of different sizes | A moderate amount of text in the slide deck is less than 24pt | Some, but very little text in the slide deck is less than 24pt | All text in the slide deck is 24pt or greater. Size effectively differentiates different levels of text. |
| 1 | Length    | Slide deck for 8 minute talk has fewer than 6 or greater than 16 slides                                                          | Slide deck for 8 min talk has 6-8 or 14-16 content slides     | Slide deck for 8 min talk has 8-9 or 13-14 slides              | Slide deck for 8 min talk has 10-12 total slides                                                         |

Supplemental Table 6: Rubric for Scoring Video Recordings of the Content Components of Student's Oral Presentations

| Weight | Criteria                      | Beginning (1)                                                      | Developing (2)                                                                                                                 | Proficient (3)                                                                                                                    | Mastery (4)                                                                                                                                   |
|--------|-------------------------------|--------------------------------------------------------------------|--------------------------------------------------------------------------------------------------------------------------------|-----------------------------------------------------------------------------------------------------------------------------------|-----------------------------------------------------------------------------------------------------------------------------------------------|
| 1      | Introduction                  | Doesn't introduce self, starts body of presentation immediately    | Provides only name or institution                                                                                              | Provides both name and institution                                                                                                | Provides a full introduction of name, institution, and topic                                                                                  |
| 1      | Background                    | Background not covered                                             | Insufficient information is provided to understand the present study, or information provided does not relate to current study | Background information is relevant but too little or too much is provided                                                         | Relevant and appropriate amount of background provided to understand the study                                                                |
| 2      | Motivation                    | Motivation is not covered                                          | Insufficient information provided and leaves the question of why the study is being performed                                  | Too much or too little explanation is provided                                                                                    | Motivation is clearly stated such that audience knows why this study is being performed                                                       |
| 1      | Statement of hypothesis/aims  | No mention of hypothesis, research question, or research aims      | Either main question or aims, but not both, are provided                                                                       | Main question and research aims are covered but are unclear                                                                       | Clear statement of research question/hypothesis and research aims                                                                             |
| 1      | Methodology                   | No mention of methods                                              | Methods are described, but not connected to aims or results                                                                    | Methods provided but too much or too little detail given                                                                          | Key methods described with only those details needed to understand results                                                                    |
| 1      | Results (if data present)     | Does not identify features and patterns in data                    | Identifies some features and patterns but misses most opportunities to employ them to future understanding                     | Points out features or patterns in data that do not help in understanding                                                         | Points out relevant features in data and concepts                                                                                             |
| 1      | Results (if there is no data) | Does not identify experiments to test research question/hypothesis | Identifies experiments to test research question but does not explain why the experiments will be performed                    | Identifies experiments to test research question and why they will be performed but not what the potential results would indicate | States what experiments will be performed to test hypothesis/answer research question, and what the results from those experiments would mean |
| 1      | Conclusions                   | No clear summary or conclusion provided                            | Brief concluding summary provided                                                                                              | Summary provided has too much information or too little information                                                               | Clear summary of what was learned                                                                                                             |
| 2      | Significance/Implications     | Significance of findings is not provided                           | Significance of findings described but unclear or not relevant to conclusions                                                  | Significance of most findings described and are somewhat related to conclusions                                                   | Significance of each major finding described clearly related to conclusions                                                                   |
| 1      | Future Directions             | No future directions are described                                 | Future work briefly described but does not relate to findings                                                                  | Description of future work, but some are not related to findings                                                                  | Future directions are outlined, are logical extensions of findings                                                                            |
| 0.5    | Acknowledgements              | Does not acknowledge colleagues or funding                         | Acknowledgement slide but little or no verbal acknowledgement                                                                  | Verbal acknowledgement but does not follow slide logically                                                                        | Clear slide and verbal acknowledgement of people and their roles                                                                              |

Supplemental Table 7: Rubric for Scoring Video Recordings of the Style Components of Student's Oral Presentations

| Weight | Criteria    | Beginning (1)                                                                                                                               | Developing (2)                                                                                                                                              | Proficient (3)                                                                                                                                       | Mastery (4)                                                                                            |
|--------|-------------|---------------------------------------------------------------------------------------------------------------------------------------------|-------------------------------------------------------------------------------------------------------------------------------------------------------------|------------------------------------------------------------------------------------------------------------------------------------------------------|--------------------------------------------------------------------------------------------------------|
| 1      | Balance     | No balance in presentation. Sections of presentation are missing                                                                            | Too much time was spent on two different sections, not enough time was spent on other sections                                                              | Too much time spent on one section                                                                                                                   | Presentation is well-balanced. All parts included                                                      |
| 1      | Figures     | No figures or animations used                                                                                                               | Limited attempts to use media/are of minimal utility in illustrating ideas or are detrimental to understanding                                              | Use of media varies between appropriate and ineffective                                                                                              | Use of media (animations, figures, and videos) aids audience understanding                             |
| 2      | Language    | Language is inappropriate (too technical)/terminology is undefined                                                                          | Language switches between technical and everyday language causing confusion. Terminology is rarely defined                                                  | Language is often appropriate but some language is too technical; some terminology is not defined                                                    | Appropriate language used for the audience. Terminology is clearly defined                             |
| 1      | Scaffolding | Starts too high or ends too low. No evidence of incremental building of understanding. Presentations lacks any connections between material | Either starts too high or ends too low (underestimate the ability of the audience). Incremental building of understanding evident in some cases but not all | Starts with level of comprehension either slightly too high or too low. Attempts to build understanding but some steps are too large. There is a gap | Starts out at an appropriate level of comprehension. Builds understanding to develop complicated ideas |
| 1      | Transitions | There are no clear connections between parts of the talk                                                                                    | It is rarely clear how the parts of the presentation relate to each other                                                                                   | It is not always clear how the parts of the presentation relate to each other                                                                        | Clear connections are made from one part of the presentation to the next                               |
| 1      | Poise       | No eye contact is made, presenter is fidgeting or reading from a screen                                                                     | Some eye contact is made but presenter fidgets and frequently reads from a screen                                                                           | Eye contact is made most of the time. Limited reading from a screen. No fidgeting/limited use of um                                                  | Presenter makes eye contact and does not read from a screen with audience, does not fidget or say um   |
| 1      | Pace/Rhythm | The pace of the presentation is too fast or too slow for the whole presentation                                                             | Presenter goes too fast or too slow for whole sections of the presentation                                                                                  | The presenter speaks too quickly sometimes but generally has a good pace                                                                             | Presenter paces their speech so that audience can stay with them                                       |
| 1      | Voice       | Speaker is hard to hear due to mumbling or being too quiet                                                                                  | Voice goes back and forth between being loud/clear and soft/mumbling                                                                                        | Voice is loud most of the time with minimal mumbling                                                                                                 | Voice is loud and clear. No mumbling                                                                   |

Supplemental Table 8: Bivariate Analysis of Demographic Factors Influencing Changes in Comfort Interacting with Mentors

| <b>Topic Area</b>                  | <b>Demographic</b>   | <b>Mean Improvement</b> | <b>N</b> | <b>Significance</b> |
|------------------------------------|----------------------|-------------------------|----------|---------------------|
| Navigating Difficult Conversations | Women                | 0.62                    | 13       | 0.046               |
|                                    | Men                  | -0.60                   | 5        |                     |
|                                    | First Generation     | 1.00                    | 7        | 0.033               |
|                                    | Not First Generation | -0.18                   | 11       |                     |
| Receiving Feedback                 | Latino               | 1.00                    | 3        | 0.017               |
|                                    | Not Latino           | 0.07                    | 15       |                     |
